# Supplementary material for: ABCA7 Regulates Brain Fatty Acid Metabolism During LPS-Induced Acute Inflammation
Source: Front Neurosci. 2021 Apr 7;15:647974. doi: 10.3389/fnins.2021.647974 (PMC8059705; doi:10.3389/fnins.2021.647974)
Supplement: Supplementary file 1 [file Data_Sheet_1.xlsx]

## Sheet: Sheet1
Compound	p ([HE] vs [WT])	FC ([HE] vs [WT])	p ([WT+LPS] vs [WT])	FC ([WT+LPS] vs [WT])	p ([HE+LPS] vs [HE])	FC ([HE+LPS] vs [HE])	p ([HE+LPS] vs [WT+LPS])	FC ([HE+LPS] vs [WT+LPS])	Ionization mode	CAS Number	HMP ID	KEGG ID	LMP ID	MS1 Composite Spectrum
3S-hydroxy-dodecanoic acid	0.000168758	-1.3101	>0.05	1.06634	0.000668946	1.17687	0.000407693	-1.18706	HILIC-					(215.165, 4194.01)(216.1683, 603.71)
C7 H8 N3 O7	0.000169696	1.17572	0.018094	1.08636	0.000952296	-1.11825	>0.05	-1.03327	C18+					(247.0424, 34212.73)(248.0455, 2624.14)(249.0472, 354.82)
PC(20:4(5Z,8Z,11Z,14Z)/18:4(6Z,9Z,12Z,15Z))	0.000170419	1.79186	0.00405749	1.43369	>0.05	-1.29996	>0.05	-1.04012	HILIC+		HMDB08437	C00157		(824.5279, 812.23)(825.5244, 236.14)(802.5381, 4793.65)(803.5417, 2472.27)
> limit Esi+3.977002	0.000173791	1.81784	0.00596935	1.45203	0.0418919	-1.34072	>0.05	-1.07092	HILIC+					(868.5463, 1604.95)(869.5494, 959.15)(870.552, 405.6)(846.5637, 14168.78)(847.5672, 7713.24)(848.572, 2466.49)(849.577, 731.58)
C21 H35 N20 O2	0.000179979	1.3408	0.00134625	1.24521	>0.05	-1.0386	>0.05	1.03675	HILIC+					(600.3316, 3048.98)(601.336, 1081.91)
C22 H29 N4 O5	0.00018557	-1.97815	>0.05	-1.26775	>0.05	1.1707	>0.05	-1.33285	HILIC-					(428.2068, 15575.16)(429.2104, 4025.1)(430.216, 1031.89)
PS(O-18:0/22:6(4Z,7Z,10Z,13Z,16Z,19Z))	0.000193536	1.73112	0.00937323	1.42372	>0.05	-1.29951	>0.05	-1.06875	HILIC+				LMGP03020083	(844.5471, 2525.7)(845.5502, 1301.55)(822.5638, 8037.89)(823.5672, 4093.6)(824.5712, 1556.08)(825.5764, 240.98)
Barbituric acid, 5-ethyl-5-(2-hydroxyethyl)-	0.000206316	2.13496	0.019524	1.58068	>0.05	-1.24884	>0.05	1.08153	C18+	710-77-0				(223.0687, 2595.69)(224.0748, 743.96)(201.0869, 32296.36)(202.0901, 2781.08)
PC(18:3(6Z,9Z,12Z)/20:4(8Z,11Z,14Z,17Z))	0.00020855	3639.58	0.02042	139.405	>0.05	-13.0743	>0.05	1.99689	HILIC+		HMDB08181	C00157		(826.5427, 424.52)(804.552, 2422.12)(805.556, 1161.39)
PC(18:1(9E)/0:0)[U]	0.000215797	1.26131	0.00347952	1.187	>0.05	-1.03166	>0.05	1.02999	HILIC+				LMGP01050115	(544.3374, 26470.91)(545.3408, 8121.27)(522.3551, 180618.14)(523.3582, 51110.4)
C25 H37 N12 O5	0.000218666	1.32444	0.0180872	1.19007	>0.05	-1.11093	>0.05	1.00178	C18+					(586.3081, 4498.9)(587.311, 1271.09)(588.3142, 143.89)
Totarol-19-Carboxylic Acid Esi+1.2409999	0.000220552	1.45523	0.000948927	1.36921	>0.05	-1.19325	>0.05	-1.12272	HILIC+					(339.195, 2449.58)(340.1975, 106.47)(317.2103, 16011.57)(318.2127, 4402.84)(334.2453, 595.46)(335.2541, 23.58)(650.439, 200.76)
C10 H8 O15 S	0.000223528	-1.12713	0.00798803	-1.08536	0.00795697	1.0854	>0.05	1.04517	HILIC-					(398.9504, 12281.31)(399.9546, 900.43)(400.952, 225.04)
PC(18:3(6Z,9Z,12Z)/22:5(4Z,7Z,10Z,13Z,16Z)) Esi+3.9230013	0.000232332	1.74746	0.0269353	1.39483	>0.05	-1.32088	>0.05	-1.05434	HILIC+		HMDB08187	C00157		(852.5529, 777.26)(853.5566, 431.32)(830.569, 5245.96)(831.5718, 2806.37)(832.5789, 1469.35)
Trp-Met-OH	0.000234492	1.5578	0.0214513	1.31377	>0.05	-1.14824	>0.05	1.03266	HILIC-					(456.1332, 687.76)(457.1473, 402.14)(516.1459, 1933.02)(517.1507, 422.25)
Pinnasterol	0.000257772	1.95123	>0.05	1.23081	0.0400895	-1.46659	>0.05	1.08096	HILIC+				LMST01010283	(469.2954, 796.29)(470.2948, 141.79)(447.308, 3197.93)(448.3118, 1130.26)(449.3191, 140.57)
PC(22:6(4E,7E,10E,13E,16E,19E)/16:0) Esi+3.9429972	0.000278489	1.67074	0.00767935	1.44292	>0.05	-1.27721	>0.05	-1.10305	HILIC+				LMGP01011115	(828.5526, 2308.6)(806.568, 3236.96)(807.5731, 1609.94)(808.5754, 794.1)
C15 H25 N6	0.000284169	2.50548	>0.05	1.58984	>0.05	-1.49012	>0.05	1.05759	HILIC+					(312.1996, 145.1)(290.1624, 1117.07)(307.2475, 9098.12)(308.2482, 2057.72)(596.5205, 2972.5)(579.4498, 375.19)
2-Amino-3-methyl-1-butanol	0.000309037	1.46848	0.00365581	1.35082	>0.05	-1.08429	>0.05	1.0026	C18+	473-75-6				(104.1067, 9144.85)(105.1099, 356.92)
C7 H6 N2 O9	0.000322145	1.25704	>0.05	1.10705	0.0489076	-1.14063	>0.05	-1.00453	C18+					(263.0159, 4728.1)(264.0191, 187.59)
L-Glutamate	0.000325365	1.09844	0.00278512	-1.07893	0.000168796	-1.14552	>0.05	1.03459	C18+	56-86-0	HMDB00148	C00025		(170.0427, 33365.61)(171.0454, 1768.75)(148.0607, 169913.23)(149.0638, 11025.13)
2,3-Diketo-13,14-dihydro-PGF1a	0.000328404	1.3917	>0.05	1.18833	0.0140722	-1.25345	>0.05	-1.07028	HILIC+					(389.1958, 3199.39)(390.2024, 901.62)(367.2109, 3035.61)(368.212, 1098.94)(384.2376, 918.28)(385.2448, 290.04)
> limit Esi-5.692996	0.000340544	-1.1209	0.0221438	-1.07689	0.0175675	1.07928	>0.05	1.0369	HILIC-					(928.8342, 7302.19)(929.8361, 1351.61)(930.8412, 235.77)
MID42519:1?-hydroxy-18-(4-hydroxy-4-methyl-2-pentynyloxy)-23,24,25,26,27-pentanorvitamin D3 / 1?-hyd	0.000368356	-1.58741	>0.05	-1.189	>0.05	1.14766	>0.05	-1.16331	HILIC-				LMST03020591	(441.2997, 10448.83)(442.3034, 2934.24)(443.3059, 623.92)(501.3213, 359.81)
Pregna-4,16-diene-3,11,20-trione	0.000369539	1.62882	0.0233939	1.37385	>0.05	-1.27914	>0.05	-1.07891	HILIC-			C15146		(651.3745, 339.35)(697.3681, 231.91)(325.1838, 19712.23)(326.1871, 4143.62)(371.1872, 5526.72)
C28 H43 N7 O4 S	0.000391584	1.27999	0.000923492	1.25399	>0.05	1.01369	>0.05	1.03471	HILIC+					(574.3167, 19421.16)(575.3195, 6309.78)(576.3199, 1928.67)(577.3219, 239.08)
2(3H)-Furanone	0.000392017	1.57709	0.000831318	1.52483	>0.05	1.00621	>0.05	1.0407	HILIC+	20825-71-2		C17602		(85.0288, 649.27)(102.0552, 4232.17)(186.0764, 516.01)
> limit Esi+4.563001	0.000406383	1.27671	>0.05	1.06904	>0.05	-1.12723	>0.05	1.05947	HILIC+					(824.4803, 206.27)(802.4808, 2787.1)(803.4841, 1464.25)(819.4989, 437.22)
C34 H31 N7 O5	0.00040943	1.25489	0.00125412	1.22561	>0.05	1.0045	>0.05	1.02849	HILIC+					(618.2466, 3089.8)(619.2496, 1184.33)(620.2511, 268.46)
Tetradecanoic acid, 11-hydroxy-, (S)-; Convolvulinolic acid	0.00041063	-1.23803	>0.05	1.11926	0.000170441	1.31978	>0.05	-1.04993	HILIC-				LMFA01050325	(243.1957, 3348.65)(244.2001, 243.09)
C40 H8 O4	0.000480207	1.33265	0.00264837	1.27686	>0.05	-1.0398	>0.05	1.00374	HILIC+					(553.0505, 2008.31)(554.0496, 909.73)
> limit Esi-1.0060004	0.000482015	-1.36495	0.001462	-1.32297	>0.05	1.09049	>0.05	1.05695	HILIC-					(1211.7495, 4322.87)(1212.7538, 3836.35)(1213.7535, 2576.45)(1214.7516, 1274.12)
PS(O-16:0/22:2(13Z,16Z))	0.000502955	1.31874	>0.05	1.09609	0.0410691	-1.18801	>0.05	1.01273	HILIC+				LMGP03020016	(824.5642, 5929.74)(825.5674, 3089.01)(802.6177, 4864.95)(803.6229, 2643.92)
2,4-Diamino-6,7-dimethoxyquinazoline	0.000521059	3619.82	>0.05	33.8714	>0.05	-18.0903	>0.05	5.90756	HILIC+	60547-96-8				(243.0865, 237.12)(221.1035, 10165.91)(222.1083, 1366.32)(441.2117, 380.27)
Vitamin E succinate(tocopherol succinate)	0.000539547	1.18205	>0.05	1.09733	0.0339756	-1.1139	>0.05	-1.03407	C18+	893081				(553.3889, 3954.08)(554.3921, 1532.52)(555.3924, 475.19)(531.4068, 2161.04)(532.408, 818.19)(533.4142, 257.22)
C10 H6 N6 O8	0.000542708	-2.06676	>0.05	-1.45494	>0.05	1.53525	>0.05	1.08077	HILIC-					(337.0181, 2769.32)(338.0204, 134.28)
Tiamulin	0.000614724	1.22513	0.015593	1.15838	>0.05	1.01414	>0.05	1.07258	HILIC+			C12065		(516.3052, 372.41)(517.3075, 133.39)(494.329, 7811.65)(495.334, 2552.0)
C24 H4 N2 O20 S	0.000619165	-1.13042	0.0178598	-1.09128	0.0367832	1.08247	>0.05	1.045	HILIC-					(670.8994, 5579.26)(671.9032, 748.61)
C11 H35 N13 O2 S	0.000656995	1.54347	>0.05	1.11425	0.00477727	-1.43358	>0.05	-1.03492	HILIC+					(436.2621, 1468.14)(414.2835, 2924.13)(415.2824, 371.88)(431.3258, 2901.39)(827.6414, 715.88)
Ancitabine Esi+3.470998	0.000706253	74.7184	0.000169132	543.089	>0.05	6.0874	>0.05	-1.19402	HILIC+	10212-25-6				(226.0825, 5276.52)(227.0869, 802.4)
C21 H53 N22 S2 Esi+12.526998	0.00073124	-2.21819	0.00581684	-1.92458	>0.05	1.36318	>0.05	1.18274	C18+					(700.4151, 22112.4)(701.4189, 8453.67)(702.4218, 3692.75)(678.4328, 25531.5)(679.4369, 9263.05)(680.4285, 3928.46)(681.4268, 963.26)
C7 H3 O5	0.000765203	1.63576	0.00748416	1.48528	>0.05	-1.09832	>0.05	1.00273	C18+					(168.0056, 1061.45)(185.0324, 44041.29)(186.0346, 4220.89)
C16 H O3	0.000798767	1.49925	0.00247366	1.44027	>0.05	1.04257	>0.05	1.08526	HILIC-					(480.9692, 239.33)(239.9843, 458.98)(300.005, 2618.16)(301.0074, 625.89)
PG(22:6(4Z,7Z,10Z,13Z,16Z,19Z)/18:1(9Z))	0.000813844	-1.1513	0.000299139	-1.17033	>0.05	1.03231	>0.05	1.04938	C18+				LMGP04010828	(821.5382, 7231.92)(822.543, 3482.79)(823.546, 1090.44)(824.5405, 193.38)
> limit Esi-3.970001	0.000924576	1.59819	>0.05	1.24803	0.0315372	-1.37979	>0.05	-1.07748	HILIC-					(844.5491, 6388.48)(845.5522, 3528.83)(846.5575, 1249.47)(847.558, 142.82)
15(R)-Iloprost Esi-1.1240003	0.000986081	1.3982	0.0115997	1.3006	>0.05	-1.13536	>0.05	-1.05611	HILIC-	85026-51-3				(359.2219, 12351.82)(360.2256, 3069.53)(419.2428, 760.86)(405.2278, 2003.17)(406.2325, 717.08)
> limit Esi-5.6950045	0.000988764	-1.10242	0.0287061	-1.07064	>0.05	1.06263	>0.05	1.032	HILIC-					(1586.7247, 111.76)(792.8597, 16514.6)(793.8626, 2264.22)(794.8637, 790.35)
PE(P-16:0/0:0)	0.00102308	1.77859	0.00491753	1.64337	>0.05	-1.08201	>0.05	1.00026	C18+				LMGP02070001	(460.2791, 2021.95)(461.2833, 544.13)(438.2973, 7617.68)(439.3003, 1595.54)
Aconitic acid	0.0010242	-2.71473	>0.05	-1.46592	>0.05	1.67712	>0.05	-1.10421	HILIC-	499-12-7		C00417		(346.9654, 663.32)(173.0092, 65978.55)(174.0122, 4880.95)(219.0145, 4152.46)(220.0197, 154.13)
C25 H41 O6	0.00103959	1.23033	0.00299205	1.20685	>0.05	-1.03811	>0.05	-1.0183	HILIC+					(460.2793, 1679.01)(461.2821, 461.28)(438.2973, 10925.84)(439.3008, 2913.53)(440.3112, 572.49)
> limit Esi-3.917003	0.00106498	1.71145	>0.05	1.30788	0.0187378	-1.49273	>0.05	-1.14074	HILIC-					(828.5536, 2296.8)(829.5566, 1255.41)(830.5627, 278.83)
C12 H23 N O3	0.00119473	-1.5551	>0.05	-1.14354	>0.05	1.10187	>0.05	-1.23417	HILIC-					(228.1604, 16465.92)(229.1633, 2337.86)
PS(P-20:0/20:5(5Z,8Z,11Z,14Z,17Z))	0.00120599	1.5936	>0.05	1.2678	0.0212488	-1.41314	>0.05	-1.12423	HILIC-				LMGP03030080	(820.5483, 4529.47)(821.552, 2043.06)(822.5572, 853.79)
C21 H26 N2 O5	0.00121114	1.34254	>0.05	1.14973	0.0059709	-1.28789	>0.05	-1.10293	HILIC-					(385.1781, 2993.81)(386.181, 758.58)(445.1898, 979.47)(431.1834, 11473.87)(432.1865, 2650.9)(433.1873, 431.23)
15(R)-Iloprost	0.00124318	1.30083	>0.05	1.18867	>0.05	-1.14827	>0.05	-1.04926	HILIC-	85026-51-3				(719.4604, 622.58)(359.2219, 12351.82)(360.2256, 3069.53)(419.2429, 745.15)(406.1344, 673.28)(407.1344, 308.93)
PC(O-14:0/2:0)	0.00130637	1.20614	0.00798048	1.17026	>0.05	1.0165	>0.05	1.04766	HILIC+				LMGP01020019	(518.3216, 88965.8)(519.3247, 25373.4)(520.3344, 7743.01)(521.3413, 1666.76)(1013.6528, 1135.94)(1014.6566, 706.12)(1015.6591, 125.59)(496.3396, 898086.3)(497.3432, 243014.25)(498.3456, 41552.02)(499.3483, 5842.66)(991.6713, 828.72)(992.675, 475.29)
PE(20:1(11Z)/20:4(5Z,8Z,11Z,14Z))	0.00133936	1.10246	>0.05	1.05487	>0.05	-1.00094	>0.05	1.04414	HILIC+		HMDB09267	C00350		(816.5557, 5410.54)(817.5582, 4650.53)(1610.1174, 2636.33)(1611.119, 2738.3)(794.5914, 7656.35)(795.5886, 5008.78)(1605.179, 761.21)(1606.1671, 687.51)(1607.1732, 272.33)(1588.1285, 9116.59)(1589.132, 8780.39)(1590.1389, 7397.19)(1591.1436, 4651.7)
16,17S-DHA-epoxide	0.00135359	1.51538	>0.05	1.18105	0.0253762	-1.35601	>0.05	-1.05685	HILIC-				LMFA04000052	(341.2116, 28520.35)(342.2151, 7169.44)(387.2067, 2283.46)(388.2174, 498.11)
Barbituric acid, 5-ethyl-5-(2-hydroxyethyl)-	0.00150111	2.285	0.00187119	2.24747	>0.05	-1.12695	>0.05	-1.10844	HILIC+	710-77-0				(223.069, 7991.25)(224.0709, 1855.2)(201.0871, 12020.45)(202.091, 1167.57)
C25 H52 N5 O2 Esi+9.855001	0.00151865	1.23429	0.00258139	1.2219	>0.05	-1.06052	>0.05	-1.04987	C18+					(455.4198, 1623.34)(456.4226, 493.02)
C7 H5 N3	0.00155513	1.46038	0.0034357	1.42147	>0.05	1.00279	>0.05	1.03024	HILIC+					(132.0549, 5416.91)(149.0811, 12096.94)(150.0858, 788.98)
PE(20:3(8Z,11Z,14Z)/20:5(5Z,8Z,11Z,14Z,17Z)) Esi+4.5160017	0.00171922	1.1582	0.00163004	1.15903	>0.05	-1.00043	>0.05	-1.00115	HILIC+		HMDB09368	C00350		(810.5025, 1245.15)(811.5041, 349.12)(788.5211, 19657.13)(789.5249, 9467.12)(1576.0688, 298.3)(1577.0566, 225.66)
805.5223@4.5919995	0.00176717	1.41729	>0.05	1.10422	0.0209334	-1.30806	>0.05	-1.01911	HILIC-					(804.5175, 2321.04)(805.521, 1225.66)(850.5025, 428.7)
N-Acetyl-4-O-acetylneuraminic acid	0.00177339	1.79471	0.0203878	1.57148	>0.05	-1.08957	>0.05	1.04816	C18+	16655-75-7	HMDB00796	C04015		(374.1055, 5972.64)(375.0969, 1479.88)(352.1238, 11709.26)(353.116, 4054.6)(354.1166, 395.69)
C23 H34 O11	0.00190563	-1.5707	>0.05	-1.15655	>0.05	1.27978	>0.05	-1.06119	HILIC-					(485.2024, 3696.39)(486.2052, 944.13)(487.2133, 262.29)
C30 H14 N14 O8	0.00194703	1.47509	0.00366269	1.44232	>0.05	1.0339	>0.05	1.05739	HILIC+					(721.1019, 5388.17)(722.1018, 2235.87)(699.1187, 2690.3)(700.1198, 970.3)
C16 H36 N3 O4	0.00197983	1.54432	>0.05	1.03429	>0.05	-1.33142	>0.05	1.12145	C18+					(357.2723, 546.0)(335.2788, 9012.34)(336.2821, 1859.99)(337.2819, 352.59)(352.3051, 18604.47)(353.3076, 3615.17)(354.3107, 408.29)
Val Ile	0.00199283	1.1669	>0.05	1.07562	>0.05	-1.0249	>0.05	1.0585	C18+					(231.1696, 6299.27)(232.1731, 1051.25)
C19 H9 N5 O5	0.00206301	1.6357	0.000802074	1.71058	>0.05	1.12217	>0.05	1.07305	HILIC-					(386.05, 602.19)(446.0738, 2739.06)(447.0762, 910.06)(432.0583, 10892.53)(433.0604, 2929.31)
PC(P-15:0/0:0)	0.00218515	1.79155	0.00754568	1.67524	>0.05	-1.11867	>0.05	-1.04604	C18+				LMGP01070003	(488.3107, 2326.33)(489.3156, 618.43)(466.3282, 9577.04)(467.3321, 2455.78)(468.3367, 643.73)
C23 H4 N O25 S	0.0021997	-1.10959	>0.05	-1.0682	>0.05	1.06369	>0.05	1.02401	HILIC-					(1450.7423, 203.52)(724.8721, 24273.88)(725.8753, 2997.83)(726.8765, 1220.54)
C17 H6 N2 O18 S2	0.00225523	-1.11107	>0.05	-1.05231	0.0481087	1.07649	>0.05	1.01956	HILIC-					(588.897, 80417.84)(589.9003, 8143.51)(590.9012, 3125.77)(591.9043, 198.82)
C25 H6 N3	0.0023463	1.35502	0.00342927	1.34062	>0.05	1.02217	>0.05	1.03315	HILIC+					(371.0468, 9848.27)(372.0473, 2567.19)(719.1046, 4837.32)(720.1048, 3427.3)(349.0646, 13416.68)(350.0651, 3952.44)(697.1226, 2603.58)(698.1235, 1204.23)
C21 H4 N2 O18 S	0.00239408	-1.10804	>0.05	-1.05956	>0.05	1.074	>0.05	1.027	HILIC-					(602.9122, 11106.58)(603.9155, 1644.45)(604.913, 200.44)
PI(22:0/18:3(9Z,12Z,15Z))	0.00242197	-1.27054	0.00399884	-1.25644	>0.05	1.04903	>0.05	1.03739	HILIC-				LMGP06010681	(915.5983, 5403.23)(916.6014, 3234.9)(917.6049, 1047.98)(918.6027, 74.64)
Gemfibrozil, metabolite II	0.00254269	-1.40114	>0.05	-1.10641	>0.05	1.05301	>0.05	-1.20263	HILIC-					(249.1496, 54555.48)(250.1528, 8921.83)(251.1585, 1347.51)(295.1554, 5191.93)
DMPO	0.00254689	1.24666	0.00375473	1.23673	>0.05	-1.02914	>0.05	-1.02095	C18+	3317-61-1				(114.0913, 4826.69)(115.0957, 76.42)(131.1175, 26762.92)(132.1204, 2175.85)
TXB2	0.00258995	1.44503	>0.05	1.09738	>0.05	-1.27806	>0.05	1.03031	HILIC-	54397-85-2	HMDB03252	C05963	LMFA03030002	(369.2276, 7442.5)(370.2313, 1559.45)(429.2474, 71.68)(415.2289, 377.44)
> limit Esi+5.532002	0.00281126	1.50489	>0.05	1.06072	0.00207393	-1.52259	>0.05	-1.07319	HILIC+					(852.5392, 1491.51)(853.5408, 582.77)(830.5533, 2300.83)(831.5567, 1094.4)(832.5676, 412.28)(847.5729, 421.9)
1-Aminocyclopropane-1-carboxylic acid	0.00319658	1.12739	>0.05	-1.06229	0.00965108	-1.11297	>0.05	1.07606	C18+	22059-21-8	HMDB01135	C01234		(102.0547, 8281.58)(103.058, 228.03)
> limit Esi-6.963004	0.00326017	1.58257	0.00507327	1.5519	>0.05	1.02153	>0.05	1.04173	HILIC-					(1009.2276, 3469.49)(1010.2289, 2342.61)
2-methyl-dodecanedioic acid	0.00335809	-1.36132	>0.05	-1.0344	>0.05	1.21943	>0.05	-1.07923	HILIC-				LMFA01170010	(547.3269, 271.48)(243.16, 31109.06)(244.1634, 4539.89)(245.1628, 565.29)
(R)-(+)-2-Pyrrolidone-5-carboxylic acid	0.00353355	1.43651	0.00578844	1.41171	>0.05	1.02985	>0.05	1.04794	HILIC+	4042-36-8	HMDB00805	C02237		(152.0319, 4677.32)(153.035, 201.89)(130.05, 574264.8)(131.0531, 30685.42)(147.0768, 1265120.5)(148.08, 69317.19)
PE(22:6(4Z,7Z,10Z,13Z,16Z,19Z)/0:0)	0.00372332	-9.08549	0.00481315	-8.59709	>0.05	1.25827	>0.05	1.19063	C18+				LMGP02050013	(548.2743, 95660.68)(549.2773, 29194.23)(526.2926, 565743.44)(527.2959, 167649.31)(528.2982, 29241.65)
(-)-Kanshone A	0.0037413	1.36668	>0.05	1.1914	0.00123433	-1.414	>0.05	-1.23265	HILIC-					(235.1699, 5845.94)(236.1731, 767.87)(295.1833, 3425.19)(296.1836, 242.09)(281.1755, 4443.65)
PE(22:6(4Z,7Z,10Z,13Z,16Z,19Z)/0:0) Esi+10.902	0.00374795	-9.08176	0.00460939	-8.68664	>0.05	1.25813	>0.05	1.20339	C18+				LMGP02050013	(548.2743, 95660.68)(549.2773, 29194.23)(526.2926, 565743.44)(527.2959, 167649.31)(528.2982, 29241.65)
PE(20:3(8Z,11Z,14Z)/20:5(5Z,8Z,11Z,14Z,17Z))	0.00383701	1.14857	0.00276183	1.15371	>0.05	1.00134	>0.05	-1.00313	HILIC+		HMDB09368	C00350		(810.4949, 813.82)(788.5211, 19657.13)(789.5249, 9467.12)(805.6024, 1613.15)(1576.0688, 298.3)(1577.0566, 225.66)
2(3H)-Furanone	0.00386455	1.12948	>0.05	-1.07164	0.0117935	-1.11429	>0.05	1.08624	C18+	20825-71-2		C17602		(85.0283, 453.17)(102.0547, 8281.58)
C4 H5 N O	0.0038855	1.40758	0.00628945	1.38498	>0.05	1.01776	>0.05	1.03436	HILIC+					(84.0446, 132818.56)(85.048, 6310.26)(101.0711, 17618.86)(102.0738, 907.96)(184.1111, 221.86)
6-(2-Hydroxyethyl)-5,6-dihydrosanguinarine	0.00394976	-132.076	>0.05	-1.62434	>0.05	2.08962	0.0434941	-38.9116	HILIC-			C12198		(376.1218, 4668.19)(377.1264, 1162.41)(378.1247, 242.58)
PE(20:3(8Z,11Z,14Z)/20:5(5Z,8Z,11Z,14Z,17Z))	0.00398074	1.57837	0.000351206	1.78242	>0.05	-1.03505	>0.05	-1.16886	C18+		HMDB09368	C00350		(810.5021, 1315.84)(811.5056, 602.45)(788.5222, 4705.58)(789.5259, 2580.65)(790.5417, 1319.54)
C15 H N3 O4	0.00432679	1.3805	0.000791531	1.45926	>0.05	1.08852	>0.05	1.02977	HILIC-					(285.9896, 13537.98)(286.9912, 2862.7)(287.9914, 514.82)(346.0108, 4972.66)(347.0125, 1189.7)(331.9952, 21630.86)(332.9966, 4187.54)
PC(17:1(9Z)/20:5(5Z,8Z,11Z,14Z,17Z))	0.00438069	2.1938	0.00325826	2.24489	>0.05	-1.19077	>0.05	-1.2185	C18+				LMGP01011544	(814.5356, 84342.96)(815.5387, 42522.77)(816.542, 11650.13)(817.5466, 2508.01)(1606.0784, 4863.3)(1607.0813, 5175.72)(1608.085, 2997.93)(1609.0872, 1133.71)(1610.0887, 307.46)(792.5542, 853601.8)(793.5578, 419070.66)(794.5605, 109935.91)(795.5629, 21364.05)(796.5681, 3906.1)(797.5746, 744.92)(1584.097, 9308.74)(1585.1006, 9151.15)(1586.1033, 4983.11)(1587.1051, 2043.59)(1588.1064, 571.09)
Dehydrogriseofulvin	0.00445015	1.34252	0.00389558	1.34773	>0.05	1.0315	>0.05	1.02752	HILIC+			C18838		(373.0427, 3899.23)(374.044, 500.14)(375.0421, 336.44)(723.0988, 1759.21)(724.0993, 552.53)(351.0608, 5757.69)(352.0639, 854.9)(353.0589, 785.26)(701.1178, 829.08)(702.1228, 263.04)
5'-Methoxyhydnocarpin-D	0.00456482	1.53203	0.00325324	1.55421	>0.05	1.04112	>0.05	1.02627	HILIC+			C11162		(517.1145, 1592.89)(518.1143, 691.21)(495.1341, 12816.69)(496.1354, 3398.9)
Dichlormid	0.0046635	1.24588	0.0027903	1.26	>0.05	1.04339	>0.05	1.03169	HILIC+	37764-25-3		C18782		(208.0278, 543.1)(225.0539, 9418.88)(226.0561, 1043.67)(227.0537, 219.84)
C16 H16 N2	0.0052585	1.37765	0.00477986	1.38194	>0.05	-1.01748	>0.05	-1.02065	C18+					(237.1387, 5754.29)(238.1424, 1723.54)
1-Nitro-5-glutathionyl-6-hydroxy-5,6-dihydronaphthalene	0.00532267	1.58375	0.00597157	1.57522	>0.05	1.05721	>0.05	1.06294	HILIC+			C14806		(519.1102, 795.71)(520.1101, 94.88)(497.1303, 5416.3)(498.1325, 1214.4)(499.1301, 709.26)
PE(P-18:1(9Z)/20:5(5Z,8Z,11Z,14Z,17Z))	0.00541265	1.74231	0.00208383	1.8382	>0.05	-1.06005	>0.05	-1.11839	C18+		HMDB11453			(770.5089, 25838.31)(771.5122, 12898.33)(772.5158, 3449.03)(773.5199, 624.0)(1518.0276, 262.31)(1519.0299, 294.41)(748.5277, 176939.44)(749.5307, 83181.99)(750.5336, 21161.13)(751.5369, 4181.97)(752.5429, 916.26)(1496.044, 565.15)(1497.0483, 614.1)(1498.0522, 274.88)
C22 H14 N11 O4	0.00565482	1.42951	0.017678	1.36939	>0.05	-1.01638	>0.05	1.02707	HILIC-					(495.116, 9153.07)(496.1182, 2220.46)
(R)-2,3-Dihydroxy-3-methylpentanoate	0.00586565	1.41507	0.00508184	1.42235	>0.05	1.0571	>0.05	1.05169	HILIC-			C06007		(147.0662, 9238.12)(148.0693, 576.11)
C11 H3 N O12 S2	0.00587701	1.39236	0.00665094	1.38651	>0.05	-1.13936	>0.05	-1.13458	HILIC-					(403.903, 8502.41)(404.9025, 1351.65)
Gentamicin C2b	0.00588587	1.22814	0.0013653	1.26654	>0.05	1.01165	>0.05	-1.01939	HILIC+	52093-21-7		C17706		(486.2946, 940.97)(487.3004, 212.86)(464.3124, 6165.72)(465.3171, 1693.27)
C18 H39 N9	0.00594011	-3.1548	>0.05	-1.07259	0.000947714	3.92523	>0.05	1.33452	HILIC+					(785.6224, 602.19)(382.3266, 5576.34)(383.3276, 2716.83)(399.3647, 8642.28)(400.3722, 2169.87)(780.6662, 3471.65)(781.6672, 1776.56)(764.6397, 5252.95)
> limit	0.00599345	1.43398	0.00345396	1.46355	>0.05	-1.02448	>0.05	-1.0456	C18+					(792.4908, 6582.0)(793.4945, 3741.58)(794.4994, 1164.6)(770.5089, 20295.91)(771.5123, 10934.31)(772.5166, 3216.31)
PE(19:0/22:6(4Z,7Z,10Z,13Z,16Z,19Z))	0.00602251	2.53899	0.00186298	2.83978	>0.05	-1.05201	>0.05	-1.17665	C18+				LMGP02010792	(828.5514, 124966.67)(829.5544, 61987.04)(830.5574, 16763.68)(831.5606, 3728.36)
C10 H20 N4 O6	0.00610692	1.65314	0.00649943	1.64785	>0.05	1.09072	>0.05	1.09422	HILIC+					(315.1267, 7285.95)(316.1303, 990.35)(317.1258, 123.03)(293.1451, 5329.02)(294.1515, 928.74)
844.1808@6.963004	0.00645456	1.51669	0.0114648	1.47868	>0.05	-1.00493	>0.05	1.02067	HILIC-					(843.1738, 4831.2)(844.1743, 2240.44)
C7 H2 N3 O4 S3 Esi-7.0499964	0.00648672	-1.25711	0.0178708	-1.22617	>0.05	1.01256	>0.05	-1.01251	HILIC-					(286.9117, 22913.29)(287.9119, 3498.69)
PE(P-18:1(9Z)/22:6(4Z,7Z,10Z,13Z,16Z,19Z))	0.00654531	1.84756	0.00190667	1.99785	>0.05	-1.04653	>0.05	-1.13166	C18+				LMGP02030006	(796.5249, 2645.73)(797.5284, 1308.76)(798.5491, 573.43)(799.5524, 156.46)(774.5431, 47287.96)(775.5462, 24115.53)(776.5591, 7196.18)(777.5728, 2291.74)(778.581, 552.79)(1548.0693, 92.86)
Glutamine	0.00689613	1.50715	0.00584815	1.51787	>0.05	1.05468	>0.05	1.04723	HILIC-	56-85-9	HMDB00641	C00064		(291.131, 31742.38)(292.1338, 3985.52)(293.1366, 443.47)(145.0618, 1384435.2)(146.065, 75622.38)
5-Hydroxyisourate	0.00740272	1.39947	0.0105961	1.38139	>0.05	1.09042	>0.05	1.10469	HILIC+			C11821		(185.0323, 8014.38)(186.0358, 306.99)
C12 H10 N6 O6 S2	0.00817548	-1.39852	0.00292127	-1.45086	>0.05	-1.02367	>0.05	1.01343	HILIC-					(397.0039, 6098.73)(398.0044, 1190.59)(399.0005, 847.51)
C24 H11 N O3	0.00844768	-1.40872	0.000338938	-1.60186	>0.05	-1.05851	>0.05	1.07424	C18+					(384.0643, 3293.2)(385.0678, 872.48)(362.0847, 3741.47)
deschlorobenzoyl Indomethacin	0.00855152	1.49398	0.00259626	1.57224	>0.05	1.00297	>0.05	-1.04927	HILIC-	32387-22-7				(218.082, 4062.79)(219.0849, 560.12)
C24 H19 N19 O4	0.00901397	89.0864	0.00577158	110.749	>0.05	4.71362	>0.05	3.79164	HILIC-					(636.1795, 2567.15)(637.1818, 682.69)
Stearamide	0.00915826	-1.49638	0.00258497	-1.58082	>0.05	-1.10141	>0.05	-1.04258	C18+	124-26-5		C13846	LMFA08010003	(284.2943, 7564.99)(285.297, 1620.64)
5'-Methoxyhydnocarpin-D	0.00941148	1.41341	0.0218606	1.36725	>0.05	1.00089	>0.05	1.03469	HILIC-			C11162		(493.1192, 18160.46)(494.1185, 11386.58)
PC(18:3(9Z,12Z,15Z)/22:4(7Z,10Z,13Z,16Z))	0.00957417	1.91809	0.00191075	2.14883	>0.05	-1.04255	>0.05	-1.16797	C18+				LMGP01011698	(854.5667, 23313.19)(855.5701, 12648.29)(856.5735, 3862.51)(857.578, 946.06)(832.5849, 101901.32)(833.5881, 51366.33)(834.5911, 15361.98)(835.5943, 3344.88)(836.6016, 790.0)
Anibine	0.00992882	138.468	0.00255256	286.991	>0.05	2.06575	>0.05	-1.00333	HILIC+	643-91-4		C10127		(226.045, 2249.78)(227.0482, 103.85)(429.0144, 412.48)(204.0632, 922.09)
12-trans-Hydroxy juvenile hormone III	0.0106424	1.56817	>0.05	1.09375	0.00146342	-1.72971	>0.05	-1.20641	HILIC-			C16508		(281.1753, 5555.9)(282.1789, 924.53)(327.1841, 2226.59)
C21 H49 N6 O15	0.0114365	-1.55689	0.000212002	-1.9783	>0.05	-1.29779	>0.05	-1.02134	C18+					(648.3137, 4279.98)(649.3165, 1129.85)(650.3236, 294.79)(626.3291, 4730.39)(627.3321, 1687.3)(628.3501, 563.46)
13(S)-HODE	0.0122524	1.26049	0.00239787	1.31491	>0.05	1.02752	>0.05	-1.01524	HILIC-	29623-28-7		C14762		(591.4611, 812.59)(592.4588, 251.66)(295.2275, 17770.21)(296.2307, 3717.56)
2,3-Diphenyl-1-indanone	0.0126141	-1.31468	0.00132603	-1.40899	>0.05	-1.00483	>0.05	1.06658	C18+	1801-42-9		C14657		(305.0912, 5157.99)(283.1099, 15697.33)
C9 H6 N5 O8 S	0.0126169	1.37696	0.00107215	1.50496	>0.05	-1.03989	>0.05	-1.13656	HILIC-					(342.9863, 7882.61)(343.9887, 1224.54)(344.9848, 591.53)(388.992, 483.27)
2-amino-4-cyano-butanoic acid	0.0126858	1.27507	0.0104273	1.28215	>0.05	1.07933	>0.05	1.07337	HILIC+			C05717		(151.0476, 6196.34)(129.0662, 1680.54)(146.0978, 712.77)
C9 H4 N O7 S	0.0127643	1.31749	0.00173898	1.40149	>0.05	1.07653	>0.05	1.01201	HILIC-					(268.9636, 7297.96)(269.9658, 1416.05)(270.9616, 202.89)(328.9812, 1178.45)
2-amino-4-cyano-butanoic acid	0.0129296	1.49196	0.0147626	1.48274	>0.05	1.04805	>0.05	1.05457	HILIC-			C05717		(127.0514, 46717.24)(128.0538, 682.88)
PE(22:6(4Z,7Z,10Z,13Z,16Z,19Z)/22:4(7Z,10Z,13Z,16Z))	0.0131653	1.77994	0.000536351	2.20607	>0.05	1.10593	>0.05	-1.12069	C18+				LMGP02011160	(862.5356, 3496.06)(863.5376, 1840.5)(864.5534, 666.24)(840.5538, 14033.28)(841.5571, 7698.2)(842.5743, 3260.31)
Luteolin 7,4'-diglucuronide-3'-glucoside	0.0133985	1.53364	0.0128924	1.53656	>0.05	1.04795	>0.05	1.04596	HILIC-				LMPK12110684	(845.172, 1489.97)(846.1741, 535.85)(847.173, 222.62)
5-Nitro-ortho-anisidine	0.0135025	1.30317	0.0063312	1.33371	>0.05	1.08383	>0.05	1.05902	HILIC+	99-59-2		C19469		(191.04, 2028.12)(359.0911, 333.61)(169.0583, 72287.43)(170.0616, 4412.84)(337.1064, 1049.49)(338.1086, 33.67)
PE(22:6(4Z,7Z,10Z,13Z,16Z,19Z)/22:6(4Z,7Z,10Z,13Z,16Z,19Z))	0.0142255	1.96131	0.000634021	2.50257	>0.05	1.13964	>0.05	-1.11963	C18+				LMGP02010093	(858.5046, 3908.22)(859.5076, 2355.39)(860.5147, 904.48)(861.513, 153.03)(836.5229, 15859.57)(837.5261, 8592.62)(838.5362, 4116.88)(839.5368, 919.5)
PC(22:6(4Z,7Z,10Z,13Z,16Z,19Z)/22:6(4Z,7Z,10Z,13Z,16Z,19Z))	0.0145822	1.93269	0.000468708	2.52985	>0.05	1.15722	>0.05	-1.13114	C18+		HMDB08748	C00157		(900.5547, 1268.98)(901.551, 921.35)(902.5487, 329.27)(878.5694, 15051.85)(879.5725, 8619.16)(880.5738, 3269.69)(881.5759, 1019.28)
Amidosulfuron	0.0148629	1.28123	0.00539701	1.31929	>0.05	1.07936	>0.05	1.04822	HILIC-	120923-37-7		C10933		(368.0308, 3968.82)(369.0322, 272.79)
C21 H27 N6 O6 S2	0.0151957	1.3332	0.00423444	1.3915	>0.05	-1.01893	>0.05	-1.06349	HILIC-					(522.136, 8285.18)(523.1384, 2261.69)(524.1354, 1173.16)(568.1446, 93.01)
C21 H28 N7 O	0.017064	1.65798	0.00209751	1.87731	>0.05	-1.11827	>0.05	-1.2662	HILIC-					(393.2274, 4928.96)(394.2309, 1380.27)(453.2119, 1137.44)(439.2308, 1639.65)
C34 H55 N12 O3	0.0175984	-1.75633	0.000212713	-2.49149	>0.05	-1.06702	>0.05	1.32947	C18+					(702.4314, 4643.8)(703.4354, 1840.41)(680.4592, 6949.51)(681.4605, 3260.07)(682.4631, 882.31)
Creatinine	0.0176649	-1.33359	0.00199021	-1.43608	>0.05	-1.07125	>0.05	1.00522	C18+	60-27-5	HMDB00562	C00791		(249.1062, 389.16)(114.0661, 283052.25)(115.069, 11993.42)(227.1251, 1972.77)
C12 H17 N3 O3 S	0.0184315	-1.28762	0.00170051	-1.38288	>0.05	-1.00883	>0.05	1.06458	C18+					(306.0878, 20986.42)(307.0915, 1747.2)(284.1064, 61672.17)(285.1098, 5798.27)(286.1094, 754.04)
PS(13:0/12:0)	0.018907	-1.66359	0.00224882	-1.89284	>0.05	-1.04023	>0.05	1.0938	C18+				LMGP03010068	(660.385, 10708.5)(661.4056, 7075.99)(662.3992, 1992.28)(638.4026, 96142.8)(639.4059, 32664.61)(640.4072, 7324.85)(641.4062, 1405.46)
C25 H13 N6 O3	0.0199654	65.126	0.0146535	76.6532	>0.05	2.01362	>0.05	1.71081	HILIC-					(444.0975, 2311.36)(445.1024, 561.37)
C29 H33 N16 O3	0.0201583	-1.49677	0.00125887	-1.71204	>0.05	-1.09407	>0.05	1.04548	C18+					(676.2822, 1345.06)(677.2845, 453.4)(654.2978, 2994.7)(655.3027, 949.75)
C35 H45 N11 O2	0.0201807	-1.91121	>0.05	-1.6684	>0.05	-1.03743	0.00206305	-1.18841	C18+					(674.3641, 1389.74)(675.3682, 580.55)(652.391, 920.09)(653.3859, 134.47)(654.3804, 122.13)
C31 H49 O9	0.0210348	-1.76036	0.00320683	-2.004	>0.05	-1.10027	>0.05	1.03466	C18+					(588.3267, 17685.77)(589.3303, 5836.98)(590.3389, 1836.92)(1153.6628, 1279.33)(1154.6656, 840.86)(566.3452, 135593.83)(567.3482, 40496.61)(568.3516, 8898.48)(569.3551, 1504.54)(1131.6823, 1156.18)(1132.6847, 661.48)
C32 H49 O11	0.0218095	-1.67007	0.0014413	-1.97827	>0.05	-1.14069	>0.05	1.03844	C18+					(632.3227, 10171.95)(633.3265, 3103.18)(634.3304, 393.54)(1241.6467, 137.5)(1242.644, 76.43)(610.3349, 54253.79)(611.3381, 17907.79)(612.3419, 4444.61)(613.3447, 816.23)(1219.6569, 227.83)(1220.6663, 103.27)
Phytuberin	0.021957	-1.11221	0.000214883	-1.19341	>0.05	-1.05098	>0.05	1.02096	C18+	37209-50-0		C09709		(317.1772, 1086.41)(295.1904, 6364.06)(296.1935, 1070.35)(312.2187, 454.94)
C4 H14 N3 O S	0.0220799	1.42929	>0.05	-1.2143	>0.05	-1.22629	0.0272283	1.41531	HILIC+					(153.0927, 2957.45)(154.0934, 577.18)(305.1617, 3166.21)
C27 H17 N4 O6	0.0232278	1.28598	0.00335294	1.36596	>0.05	-1.01963	>0.05	-1.08304	HILIC-					(492.1076, 8357.54)(493.111, 1996.44)
PE(20:5(5Z,8Z,11Z,14Z,17Z)/22:5(7Z,10Z,13Z,16Z,19Z))	0.0248628	1.10461	0.011361	1.11581	>0.05	1.05339	>0.05	1.04282	HILIC+				LMGP02010166	(834.5149, 989.3)(835.4961, 413.22)(812.5213, 22132.29)(813.5244, 11547.33)
C32 H51 O10 Esi+12.411007	0.0255401	-1.69739	0.00173387	-2.02698	>0.05	-1.12123	>0.05	1.06505	C18+					(618.3381, 4348.9)(619.3419, 1693.53)(596.3551, 18953.5)(597.3587, 6100.73)(598.3611, 1816.91)(599.3599, 222.98)
PS(20:2(11Z,14Z)/16:0)	0.0257211	-1.13283	0.0024004	-1.17557	>0.05	1.02636	>0.05	1.06508	HILIC-				LMGP03010564	(786.5281, 15399.81)(787.5312, 6633.73)(846.5469, 6099.77)(847.5495, 3084.75)(848.5363, 1612.98)(849.5334, 231.83)
N5-Ethyl-L-glutamine	0.0262355	1.34647	0.00077	1.5368	>0.05	1.12471	>0.05	-1.0148	HILIC+	3081-61-6		C01047		(197.09, 1759.06)(175.1078, 43405.5)(176.1111, 3404.86)
3R-hydroxy-tridecanoic acid	0.0263278	-1.15458	>0.05	1.05312	>0.05	1.10665	>0.05	-1.09873	HILIC-					(229.1806, 2990.62)(230.1842, 153.92)
N-stearoyl tyrosine	0.0266902	1.34847	0.000199348	1.68507	>0.05	1.15992	>0.05	-1.07733	C18+				LMFA08020100	(448.3411, 3075.3)(449.3443, 1011.68)
PG(O-18:0/22:4(7Z,10Z,13Z,16Z))	0.0279895	-1.1	0.000203189	-1.181	>0.05	-1.02221	>0.05	1.05031	HILIC+				LMGP04020040	(836.5431, 910.46)(813.5992, 2422.3)(814.6033, 1267.32)(815.6088, 648.16)
C13 H17 N4 S	0.0281957	-1.26471	0.000962293	-1.39864	>0.05	-1.0009	>0.05	1.10491	C18+					(284.1064, 61672.17)(262.1238, 2759.98)
C31 H49 O10	0.0310364	-1.35813	0.00270204	-1.49617	>0.05	-1.11319	>0.05	-1.01048	C18+					(604.3218, 6942.32)(605.3247, 2109.43)(606.3332, 356.78)(582.3398, 48067.56)(583.3427, 14820.24)(584.3466, 3728.9)(585.3512, 628.21)
Methylmalonic acid	0.0335729	-1.42134	0.00460238	-1.55972	>0.05	-1.18864	>0.05	-1.08319	HILIC-	516-05-2	HMDB00202	C02170	LMFA01170118	(295.0646, 111.48)(117.0191, 37648.52)(118.0218, 2308.25)
C25 H41 N3 O5	0.0424734	1.16052	0.00249261	1.22961	>0.05	1.00068	>0.05	-1.05881	HILIC-					(462.2981, 6965.04)(463.3012, 1719.14)
(ｱ)-Taxifolin	0.0463185	-1.10389	0.00209038	-1.15187	>0.05	-1.00118	>0.05	1.04223	HILIC-	480-18-2		C01617		(303.0502, 220313.6)(304.053, 24414.68)
C30 H55 N6 O2 S2	0.0484648	-1.47746	>0.05	-1.64701	0.0458731	-1.46175	>0.05	-1.31127	C18+					(618.3736, 7567.34)(619.3788, 2691.53)(596.3909, 13319.01)(597.3946, 4461.55)(598.3824, 1870.4)
C21 H43 N4 O4	>0.05	-24.5823	0.00978504	138.129	0.000539446	687.35	>0.05	-4.94003	HILIC+					(416.3347, 4091.88)(417.3392, 1173.53)(433.3659, 204.09)
C15 H39 N16	>0.05	-21.8071	>0.05	28.3607	0.000273486	598.849	>0.05	-1.03275	HILIC+					(444.3576, 4252.18)(445.3726, 746.13)(446.3756, 96.88)
C26 H53 N9 O7 S	>0.05	-2.21934	>0.05	-2.19244	>0.05	-1.15202	>0.05	-1.16615	C18+					(658.3686, 10915.88)(659.3719, 3854.5)(660.3753, 1618.32)(636.3863, 21811.28)(637.3897, 7208.49)(638.3887, 2045.89)(639.3948, 495.28)
C33 H39 N14 O	>0.05	-2.13853	>0.05	-2.80688	0.010879	-1.58491	>0.05	-1.20753	C18+					(670.3348, 81.0)(648.3504, 17316.61)(649.3547, 6659.75)(665.3842, 919.13)
POV-PC Esi+12.015995	>0.05	-2.03418	0.00115072	-3.23913	>0.05	-1.12989	>0.05	1.4093	C18+	121324-31-0				(616.3578, 50059.41)(617.3611, 15758.59)(594.3764, 170028.23)(595.3793, 52255.38)(596.3819, 11953.29)(597.3852, 1868.63)(611.4076, 297.2)
PE(15:1(9Z)/22:0)	>0.05	-1.67506	0.00291118	-4.17638	>0.05	-2.24379	>0.05	1.11119	C18+				LMGP02010500	(760.5844, 113759.48)(761.5878, 50487.69)
C27 H49 N4 O2	>0.05	-1.53881	>0.05	-1.68882	>0.05	-1.23632	0.0429457	-1.1265	C18+					(484.3748, 3833.56)(485.3746, 1587.68)(462.3933, 14714.51)(463.3967, 4692.31)(464.3982, 690.08)
C20 H16 N O6	>0.05	-1.41469	0.000936504	-2.76486	>0.05	1.05854	0.0236874	2.06881	HILIC-					(365.0906, 6087.18)(366.094, 981.33)
C26 H57 N12 O5 S	>0.05	-1.39515	0.00450456	-1.94343	>0.05	-1.37844	>0.05	1.01055	C18+					(672.4194, 9362.49)(673.4221, 3394.51)(650.4371, 12041.73)(651.4408, 4478.76)(652.4276, 1615.06)(653.4259, 284.87)
docusate	>0.05	-1.33983	>0.05	1.55313	0.000168825	3.08771	>0.05	1.48381	HILIC-			C07874		(421.2257, 12808.72)(422.2282, 3206.75)(423.2247, 955.26)
C44 H49 N2 S	>0.05	-1.31714	0.000614194	-1.94835	>0.05	-1.40064	>0.05	1.05611	C18+					(660.3474, 1283.61)(661.3593, 532.0)(638.3666, 2573.29)(639.3811, 1323.71)(640.3663, 448.97)
C29 H13 N2 O4	>0.05	-1.23941	0.000750729	-1.56243	>0.05	-1.14262	>0.05	1.10327	HILIC-					(452.0805, 5392.66)(453.0831, 1818.47)
MGDG-O(16:3(7Z,10Z,13Z))	>0.05	-1.1507	0.000745466	-1.40305	>0.05	-1.03684	>0.05	1.17598	HILIC-				LMGL05030006	(805.4755, 3566.41)(806.4782, 1793.12)
C35 H36 N O	>0.05	-1.14999	0.00509816	-1.3778	>0.05	-1.16084	>0.05	1.0321	HILIC-					(485.2718, 13628.74)(486.2755, 6872.98)(487.2783, 1953.42)(531.2626, 1043.68)(532.2592, 571.02)
C37 H48 N13 O2 S	>0.05	-1.14348	0.00117303	-1.3164	>0.05	-1.10723	>0.05	1.03974	C18+					(739.3857, 3388.96)(740.3876, 1563.23)(741.386, 426.42)
C28 H46 N12 O9	>0.05	-1.13863	0.000440982	-1.27321	>0.05	-1.04039	>0.05	1.07478	C18+					(695.3582, 128512.65)(696.3611, 48168.54)(697.364, 12078.79)(698.3735, 2918.98)(699.3679, 626.9)(712.3778, 306.21)
Homocysteinesulfinic acid	>0.05	-1.13754	0.000998375	-1.45568	>0.05	-1.09383	>0.05	1.16991	HILIC-	31523-80-5	HMDB06462			(166.0176, 15730.56)(167.0217, 838.55)
Ioxynil	>0.05	-1.12808	0.000673905	-1.30237	>0.05	-1.13044	>0.05	1.02129	HILIC-	1689-83-4		C18546		(429.8443, 2401.04)(430.8423, 1012.02)
C40 H70 N2 O9	>0.05	-1.11944	0.000790915	-1.406	>0.05	-1.10058	>0.05	1.1412	HILIC-					(721.5012, 4304.85)(722.5049, 1747.93)(723.5071, 359.31)
<none> Esi-7.0710053	>0.05	-1.11565	0.000321635	-1.28885	>0.05	-1.0833	>0.05	1.0664	HILIC-					(333.8571, 3182.29)(334.8566, 1013.2)
11-Hydroxyandrosterone	>0.05	-1.11484	0.000189092	-1.68063	0.00184253	1.01122	>0.05	1.52442	C18+			C14606	LMST02020086	(329.2083, 2612.91)(330.2128, 527.19)
C10 H13 N5 O8	>0.05	-1.10153	0.00247408	-1.20729	>0.05	-1.09303	>0.05	1.00273	HILIC-					(330.0686, 5458.49)(331.0718, 575.51)
C10 H19 N O4	>0.05	-1.08508	0.0445403	-1.14614	0.0378296	-1.15006	>0.05	-1.08879	C18+					(218.1387, 5706.52)(219.1417, 682.55)
PS(22:6(4Z,7Z,10Z,13Z,16Z,19Z)/20:3(8Z,11Z,14Z))	>0.05	-1.08431	0.000994202	-1.1772	>0.05	1.00093	>0.05	1.08667	HILIC-				LMGP03010838	(856.5112, 2721.65)(857.5149, 1363.96)(858.5237, 531.05)
C6 H5 N4 S3	>0.05	-1.08352	0.00480415	-1.92198	>0.05	-1.50335	>0.05	1.17991	HILIC-					(227.9602, 3413.49)
PS(17:0/22:4(7Z,10Z,13Z,16Z))	>0.05	-1.0815	>0.05	1.08609	0.000275649	1.21059	>0.05	1.03064	HILIC-				LMGP03010247	(824.545, 2604.08)(825.5507, 1367.96)
LY255283	>0.05	-1.07139	0.00198545	-1.1879	>0.05	-1.08445	>0.05	1.02241	C18+	117690-79-6				(383.2036, 3627.99)(384.2091, 632.74)(743.4253, 1457.97)(361.2251, 1616.34)(362.2289, 162.45)(378.2526, 494.94)(721.4372, 1840.24)
13Z-octadecenoic acid	>0.05	-1.07049	>0.05	1.15541	0.0258514	1.17957	>0.05	-1.04856	HILIC-				LMFA01030290	(563.5057, 2500.39)(564.513, 1480.21)(281.2483, 80145.64)(282.2517, 15520.45)(341.3047, 1398.63)(342.3096, 251.67)
C9 H N S2	>0.05	-1.07023	0.00649367	-1.68932	>0.05	-1.33747	>0.05	1.18019	HILIC-					(185.9474, 3680.72)(245.9703, 35337.38)(246.9712, 6019.02)
C25 H34 N17 O4 Esi+12.807999	>0.05	-1.06328	0.000497215	-1.20285	>0.05	-1.05673	>0.05	1.07053	C18+					(659.287, 109223.9)(660.2901, 38504.21)(637.3047, 55680.44)(638.3084, 19297.9)(654.3319, 295611.88)(655.3351, 107122.2)(656.3378, 22538.43)
PS(19:1(9Z)/17:2(9Z,12Z))	>0.05	-1.06311	0.00184614	-1.19078	>0.05	-1.02516	>0.05	1.09261	HILIC-				LMGP03010490	(784.5101, 4994.96)(785.5138, 2229.48)(786.5162, 737.08)
C25 H34 N17 O4	>0.05	-1.06238	0.000596581	-1.20331	>0.05	-1.05914	>0.05	1.06941	C18+					(659.287, 109223.9)(660.2901, 38504.21)(661.2928, 7856.63)(662.2967, 1352.83)(1295.5822, 4638.34)(1296.5857, 3715.25)(1297.592, 981.13)(1298.5974, 495.59)(637.3047, 55680.44)(638.3084, 19297.9)(639.3105, 4169.5)(640.3146, 622.08)(654.3317, 229312.78)(655.3349, 85112.71)(656.3373, 18120.73)(657.3414, 3175.7)(658.3466, 588.0)(1290.6282, 2311.63)(1291.6304, 1825.12)(1292.6339, 633.66)
C4 H3 N4 O4 S	>0.05	-1.04068	0.00578671	-1.78376	>0.05	-1.4814	>0.05	1.15703	HILIC-					(201.9809, 10322.2)(202.9812, 1701.04)(203.9807, 735.75)
Thr Lys Lys	>0.05	-1.03853	0.0309783	-1.23454	0.000474716	-1.3865	>0.05	-1.16636	HILIC-					(749.4881, 372.55)(374.2444, 1028.57)(420.2487, 2522.03)(421.2363, 1154.98)
Palmityl-L-carnitine	>0.05	-1.03838	0.000330617	1.39278	0.000539705	1.36784	>0.05	-1.05731	HILIC+	2364-67-2		C02990		(422.3271, 255.18)(400.3419, 51080.21)(401.345, 13467.41)(402.3518, 2806.55)(403.3563, 373.41)
C4 H9 N Esi+8.505003	>0.05	-1.03365	0.000337482	1.31	0.000177308	1.37463	>0.05	1.01518	HILIC+					(72.081, 4077.11)(89.1073, 5488.77)(90.1109, 318.75)
C6 H3 N O4 S	>0.05	-1.02792	0.0119076	-1.81478	>0.05	-1.51414	>0.05	1.16601	HILIC-					(183.9704, 27873.88)(184.9724, 4729.62)(185.9702, 1157.46)
C10 H2 N4 O7	>0.05	-1.02644	0.00231857	-1.41636	>0.05	-1.06972	0.0366261	1.28994	HILIC-					(288.9859, 3344.13)(289.9865, 303.17)
1,2-Bis(4-nitrophenyl)ethane	>0.05	-1.02172	0.00332768	1.23778	0.00218253	1.2485	>0.05	-1.01294	HILIC-	736-30-1		C14589		(271.0697, 9788.09)(272.0726, 1462.18)
Adenine	>0.05	-1.02143	0.000169225	-1.47741	0.00142482	-1.2874	>0.05	1.12351	HILIC-	73-24-5	HMDB00034	C00147		(134.0471, 77962.58)(135.0495, 4424.72)
5?-Chola-3,11-dien-24-oic Acid	>0.05	-1.01897	0.0139561	1.27925	>0.05	1.21882	>0.05	-1.06949	HILIC-					(711.5517, 532.64)(355.2637, 9113.75)(356.268, 2788.58)(415.2852, 415.7)(401.3167, 642.24)
Retinol Acetate/All-trans-retinyl Acetate	>0.05	-1.01549	0.00240833	1.21224	0.00353144	1.20397	>0.05	-1.02246	HILIC-	127-47-9			LMPR01090012	(655.4817, 11374.86)(656.4844, 5691.23)(657.4798, 200.53)(715.4725, 576.84)(701.3907, 510.1)(702.3846, 392.04)(327.2329, 1698749.4)(328.2361, 377817.84)(329.2435, 64559.3)(387.2458, 421.64)(373.2326, 1011.29)
C19 H24 N5 O7	>0.05	-1.01524	0.000719469	-1.06827	>0.05	-1.03373	>0.05	1.0179	C18+					(457.1573, 17469.71)(458.1603, 4203.73)(459.1623, 1006.37)(435.1757, 3768.36)(436.1785, 782.34)(452.2018, 7525.18)(453.2043, 1556.43)(454.2079, 245.84)
1-Hexadecylamine	>0.05	-1.01368	0.00466406	-1.05396	>0.05	-1.03383	>0.05	1.00572	C18+	143-27-1				(242.2839, 39390.75)(243.2876, 7194.31)(244.2912, 615.66)
PE(22:4(7Z,10Z,13Z,16Z)/20:4(8Z,11Z,14Z,17Z))	>0.05	-1.0122	0.0190976	1.15816	0.0325017	1.14654	>0.05	-1.02245	HILIC-		HMDB09597	C00350		(874.5594, 2646.64)(875.5634, 1458.7)
PS(20:5(5Z,8Z,11Z,14Z,17Z)/18:1(9Z))	>0.05	-1.00804	0.00310679	1.44036	0.0016183	1.47359	>0.05	1.01491	HILIC+				LMGP03010857	(830.495, 997.79)(831.4988, 463.58)(808.5119, 13807.33)(809.5155, 6664.93)(825.567, 2993.33)
N8-Acetylspermidine	>0.05	-1.0077	0.0074618	1.29403	0.0245988	1.2507	>0.05	-1.04261	HILIC+	34450-15-2		C01029		(188.1756, 12438.65)(189.1789, 1335.39)
(ｱ)8-HDoHE	>0.05	-1.00741	0.027117	1.18897	0.0160956	1.20337	>0.05	1.00466	HILIC-	90780-54-4			LMFA04000026	(687.4388, 802.9)(343.2274, 90273.61)(344.2308, 20993.94)(389.2201, 463.33)
C12 H6 N8 O4 S	>0.05	-1.0052	0.000184	-1.30946	0.000623197	-1.24614	>0.05	1.04537	HILIC+					(359.0305, 1319.39)(376.0572, 6543.01)(377.058, 421.78)
CAY10526	>0.05	-1.00172	0.00150685	-1.32425	>0.05	-1.19442	>0.05	1.10679	HILIC-					(308.9251, 6593.22)(309.9157, 2575.0)(310.9137, 885.2)
Pikromycin	>0.05	1.00525	0.000244986	-1.28025	0.00393211	-1.20289	>0.05	1.0699	HILIC+			C11999	LMPK04000038	(526.3386, 4380.33)(527.3422, 1255.23)(528.344, 285.55)
Tetradecanedioic acid	>0.05	1.00842	>0.05	-1.07011	0.00221488	-1.10824	>0.05	-1.02699	C18+	821-38-5	HMDB00872	C11002	LMFA01170018	(281.1722, 13167.24)(282.1756, 2085.3)(539.3552, 362.87)(259.1906, 1231.31)
Tetradecylamine Esi+4.018002	>0.05	1.00921	>0.05	-1.45915	>0.05	1.31016	0.000338742	1.92933	HILIC+	2016-42-4				(236.1982, 241.61)(214.253, 34968.3)(215.2562, 5457.34)(427.4246, 1499.34)
Thr Lys Lys	>0.05	1.01061	>0.05	-1.1428	0.00016956	-1.40451	0.00601506	-1.2161	C18+					(376.2589, 1170.89)(377.2633, 117.88)(393.2849, 4484.67)(394.2889, 1001.47)
PC(14:0/22:5(4Z,7Z,10Z,13Z,16Z))	>0.05	1.0164	0.00288562	1.11658	0.00100087	1.12927	>0.05	1.02796	HILIC+		HMDB07890	C00157		(802.5375, 3399.17)(803.5386, 1874.66)(780.5534, 44676.6)(781.5569, 22084.61)
C23 H28 N2 O2	>0.05	1.02019	0.00243786	1.23956	0.046513	1.16439	>0.05	-1.04349	HILIC-					(727.4289, 426.34)(728.435, 158.28)(787.4354, 309.42)(773.4419, 700.84)(363.2089, 28501.67)(364.212, 6682.11)(423.2239, 1554.53)(424.23, 724.91)(409.2046, 1119.66)(410.2165, 402.81)
PC(22:6(4Z,7Z,10Z,13Z,16Z,19Z)/20:5(5Z,8Z,11Z,14Z,17Z))	>0.05	1.02181	0.000229272	1.16779	0.000854888	1.14153	>0.05	-1.00117	HILIC+				LMGP01012120	(852.5529, 4775.13)(853.5557, 2558.89)(869.5724, 963.04)
2-Butanone, 4-[6-(sulfooxy)-2-naphthalenyl]- Esi-5.6839995	>0.05	1.02363	0.00856758	1.32902	0.00858944	1.32892	>0.05	1.02355	HILIC-	91488-18-5				(293.0516, 754.29)(339.0565, 2330.98)(340.0624, 175.34)
Adenine	>0.05	1.02492	0.000169179	-1.30607	0.000263811	-1.22935	>0.05	1.08888	HILIC+	73-24-5	HMDB00034	C00147		(158.0468, 148.15)(136.0619, 589805.9)(137.0642, 37534.62)(138.0652, 1007.71)(271.1191, 332.97)
Propamocarb	>0.05	1.0352	>0.05	-1.07185	0.00443614	-1.10086	>0.05	1.00791	C18+	24579-73-5		C18885		(211.1414, 771.51)(189.1594, 15386.9)(190.1628, 1404.65)
C29 H45 N8 O3	>0.05	1.04159	0.000254422	-1.19512	0.000250767	-1.1957	>0.05	1.04108	HILIC+					(554.367, 4703.21)(555.3735, 1755.23)(556.3931, 622.93)(557.3802, 79.88)(571.4185, 387.83)
> limit Esi+3.5659986	>0.05	1.04192	0.000267527	-1.31466	0.00122293	-1.26094	>0.05	1.08631	HILIC+					(1020.8433, 4517.19)(1021.8467, 3086.87)(1022.8544, 1926.41)(1023.8603, 699.02)
PS(20:5(5Z,8Z,11Z,14Z,17Z)/18:1(9Z))	>0.05	1.04675	0.0201259	1.48358	0.0308212	1.45149	>0.05	1.02411	HILIC-				LMGP03010857	(806.4984, 5916.61)(807.5004, 2804.56)(866.5236, 612.97)
N-Formyl-4-amino-5-aminomethyl-2-methylpyrimidine	>0.05	1.06085	0.0259237	-1.26061	>0.05	-1.03549	0.011648	1.29147	HILIC-			C19872		(165.0767, 2323.12)(211.0823, 990.48)
PE(19:1(9Z)/20:5(5Z,8Z,11Z,14Z,17Z)) Esi+5.1629972	>0.05	1.06187	0.000725555	1.18697	>0.05	1.08829	>0.05	-1.02713	HILIC+				LMGP02010817	(778.5397, 7592.92)(779.5419, 3868.82)
C43 H67 N7 O3	>0.05	1.06205	0.0034366	1.20362	0.00473457	1.19672	>0.05	1.05596	HILIC+					(752.5182, 650.62)(753.5253, 286.25)(730.5371, 9927.73)(731.5413, 4715.64)
C12 H14 N9 O4	>0.05	1.0684	0.000220429	1.71476	>0.05	1.23201	>0.05	-1.30272	HILIC-					(347.109, 8001.24)(348.1118, 1370.54)
Nalpha-Methylhistidine	>0.05	1.0691	0.000169118	1.96191	0.00167455	1.53044	>0.05	-1.19907	C18+	24886-03-1		C03298		(192.0743, 1368.15)(170.0923, 16412.34)(171.0957, 1631.67)
C4 H5 N3 O6	>0.05	1.07117	>0.05	-1.07126	0.000867578	-1.12592	>0.05	1.01917	C18+					(214.0062, 4838.01)(215.0097, 307.64)(192.0246, 17158.93)(193.0279, 876.91)
PS(20:5(5Z,8Z,11Z,14Z,17Z)/20:0)	>0.05	1.08178	0.0125174	1.21644	0.0404438	1.18285	>0.05	1.05191	HILIC+				LMGP03010666	(838.5582, 4247.57)(839.5618, 2405.15)(855.5883, 969.83)
L-Tryptophan	>0.05	1.08404	0.0050231	1.24908	>0.05	1.12144	>0.05	-1.02747	HILIC-	73-22-3	HMDB00929	C00078		(203.0827, 3294.96)(204.0849, 527.78)
His Ala	>0.05	1.0946	0.000806642	2.10785	0.00199894	1.98549	>0.05	1.03105	HILIC+					(249.0964, 555.13)(227.1139, 44894.72)(228.1171, 4758.09)(229.119, 466.04)
Carnosine	>0.05	1.10302	0.000170122	2.012	0.000279227	1.75291	>0.05	-1.04061	HILIC-	305-84-0	HMDB00033	C00386		(225.0992, 13183.61)(226.1022, 1362.8)
hydroxy butyric acid	>0.05	1.10309	0.000169029	1.74993	>0.05	1.16901	0.00678535	-1.35703	HILIC-	300-85-6	HMDB00357	C01089	LMFA01050005	(253.097, 512.21)(103.0399, 29071.4)(104.0438, 1431.49)(149.0454, 18554.96)
Protionamide sulfate	>0.05	1.10485	0.00677484	1.13916	>0.05	1.04376	>0.05	1.01232	C18+					(283.0184, 5474.25)(261.0361, 2510.12)(262.0497, 86.1)(278.0629, 1054.0)
Quinacetol	>0.05	1.10767	0.000180032	1.37394	0.0138217	1.20666	>0.05	-1.02795	C18+	57130-91-3		C18944		(188.0707, 6831.8)(189.0736, 1414.53)(205.0969, 10488.38)(206.1007, 1678.36)
C10 H14 N2 O7	>0.05	1.11349	0.000382299	1.44995	0.000369365	1.4522	>0.05	1.11522	HILIC-					(273.0723, 4365.09)(274.0753, 488.71)
C20 H23 N16 O4	>0.05	1.13119	0.00307969	1.26202	>0.05	1.07757	>0.05	-1.03534	HILIC-					(550.201, 2531.71)(551.2056, 811.63)
Thymidine	>0.05	1.17367	>0.05	1.34662	>0.05	1.34094	>0.05	1.16872	HILIC-	50-89-5	HMDB00273	C00214		(241.0827, 3487.27)(242.0835, 640.94)(287.0877, 3988.56)(288.0908, 543.64)
C8 H6 N6 O2	>0.05	1.17805	0.000722155	-1.84949	0.00555817	-1.66045	>0.05	1.31217	HILIC-					(217.0482, 25252.35)(218.0516, 1766.88)
AMCC	>0.05	1.18122	0.000377266	-1.90934	0.00363105	-1.68176	>0.05	1.34106	HILIC-	103974-29-4		C11490		(219.0457, 9319.52)(220.0501, 586.0)
Queuine	>0.05	1.18311	0.00262557	1.27453	>0.05	1.10706	>0.05	1.02766	HILIC+	72496-59-4		C01449		(278.1249, 3820.92)(279.1292, 651.94)
His Ala	>0.05	1.2148	0.000169802	1.97963	0.00100446	1.60199	>0.05	-1.01722	C18+					(249.0955, 9132.45)(250.0991, 812.41)(227.1138, 19042.56)(228.1159, 2485.83)
Furcatin	>0.05	1.24729	0.000403058	1.55432	>0.05	1.11558	>0.05	-1.11704	HILIC-	499-33-2		C10458		(427.1609, 2841.02)(428.163, 1099.36)(473.1621, 4550.19)(474.167, 1455.28)
2-Aminomethylpyrimidine	>0.05	1.25563	0.00291319	1.40661	>0.05	1.11922	>0.05	-1.00092	C18+	372118-67-7				(110.0713, 5559.71)(111.0739, 390.12)
ADMA	>0.05	1.2823	>0.05	1.1772	>0.05	1.24016	0.0242059	1.35088	C18+	30344-00-4	HMDB03334	C03626		(225.1311, 6174.04)(226.1335, 406.85)(203.1501, 12392.31)(204.1528, 981.54)
Dulcitol	>0.05	1.33649	0.0296623	-1.412	0.00131283	-1.61995	>0.05	1.16492	HILIC-	608-66-2		C01697		(181.0717, 28542.62)(182.0752, 1832.28)(227.0775, 2644.46)(228.0789, 84.41)
Quercetin 3,4'-dimethyl ether 7-glucoside	>0.05	1.62926	0.00290108	2.1004	>0.05	1.30343	>0.05	1.01106	HILIC-				LMPK12112757	(491.1188, 9107.03)(492.1217, 2024.41)
C6 H10 N2 Esi+3.0780017	>0.05	1.85353	>0.05	-1.61999	0.00790141	-2.26693	>0.05	1.32456	C18+					(111.0915, 9416.54)(112.0944, 670.02)
C24 H9 N11 O4	>0.05	9.92508	0.000174349	-1229.99	0.00022356	-556.729	>0.05	21.9276	HILIC+					(516.0915, 2651.58)(517.0916, 692.18)
Quinacetol	>0.05	11.1356	0.00130443	703.429	0.0190026	144.123	>0.05	2.28153	HILIC+	57130-91-3		C18944		(188.0709, 1615.56)(205.0975, 1986.9)(206.1013, 176.11)
